# Supplementary material for: Weak intermolecular interaction directed assembly of calix[4]arene derivatives
Source: Royal Society of Chemistry journal article supplement (doi:10.1039/c9ce01286a), 2019-01-01
Supplement: c9ce01286a1.pdf [file c9ce01286a1.pdf]

## Supporting Information

### Weak intermolecular interactions directed assembly of calix[4]arene derivatives

Zufeng Xiao,<sup>a</sup> Weiping Yang,<sup>b</sup> Jia Luo,<sup>c</sup> Rong Guo,<sup>d</sup> Rong Zeng,<sup>d</sup> Lingbo Ji,<sup>b</sup> Wei Li,<sup>a,\*</sup> and Wei Wang<sup>a,\*</sup>

<sup>a</sup> School of Chemistry and Material Science, Hubei Engineering University, Xiaogan Hubei 430000, PR China

<sup>b</sup> Key Laboratory of Tobacco Flavor Basic Research, Zhengzhou Tobacco Research Institute of CNTC, 450001 Zhengzhou, Henan, PR China

<sup>c</sup> College of Life Science and Technology, Hubei Engineering University, Xiaogan Hubei 430000, PR China

<sup>d</sup> Wuhan Institute of Industrial holding Technology. Hubei 430000, PR China

Author Contributions

Zufeng Xiao,<sup>a</sup> Weiping Yang<sup>b</sup> contributed equally.

\* Corresponding Author: Wei Li, E-mail: weili@hbeu.edu.cn; Fax: +86 0712 2345464

\* Corresponding Author: Wei Wang, E-mail: 15327403696@163.com; Fax: +86 0712 2345464;

## Contents

### General synthetic procedure for calix[4]arene derivatives

**Scheme S1** Syntheses of the seven compounds.

### Supporting figure

**Figure S1** The intermolecular C–H $\cdots$ O and O $\cdots$  $\pi$  interactions in compound **16**.

**Figure S2** The intermolecular C–H $\cdots$  $\pi$  interactions and  $\pi\cdots\pi$  found in compound **17**.

**Figure S3** C–H $\cdots$  $\pi$  interactions in compound **18**

**Figure S4** One-dimensional wave structure was formed in compound **19**

**Figure S5** Molecules staggered in compound **21**.

**Figure S6** The intermolecular C–H $\cdots$ Cl and O $\cdots$  $\pi$  interactions in compound **22**

### Supporting table

**Table S1** Dihedral angles of aromatic rings and reference molecular plane R of the seven compounds.

**Table S2** Dihedral angles of the opposite aromatic rings of the seven compounds

**Table S3**  $\pi\cdots\pi$  interactions in compounds **16, 17** and **22**

**Table S4** O $\cdots$  $\pi$  interactions in compounds **16, 17** and **22**

**Table S5** Hydrogen bonds of five compounds

**Table S6** C–H $\cdots$  $\pi$  interactions of five compounds

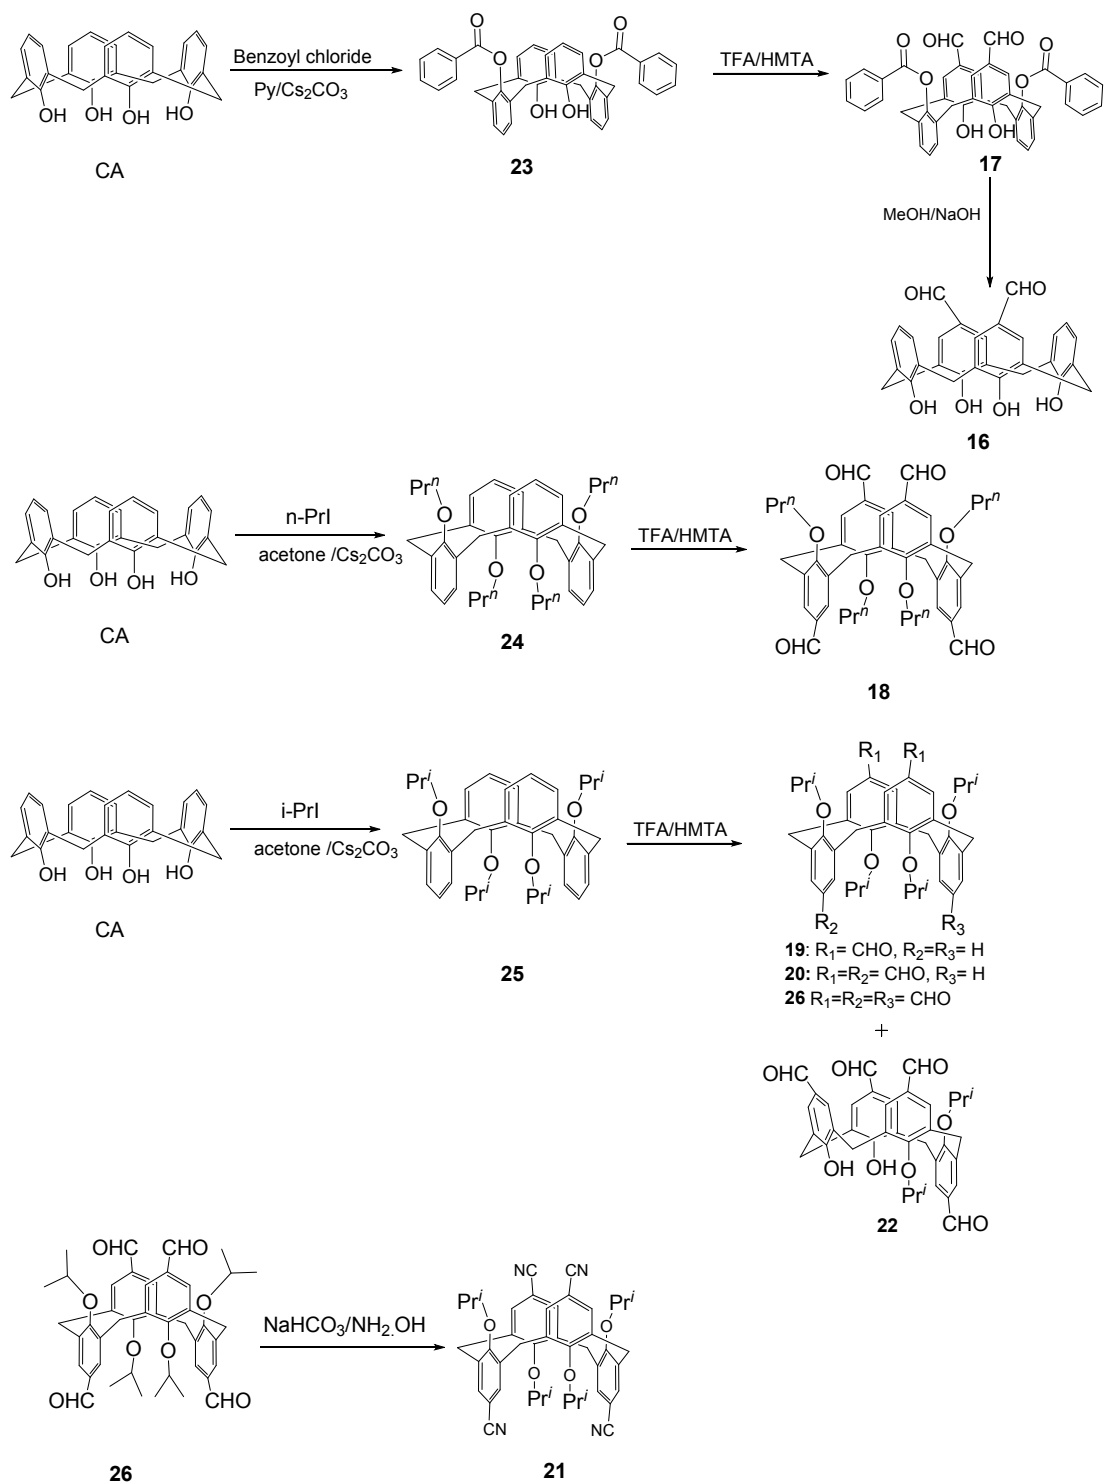

**Scheme S1** Syntheses of the seven compounds.

## Synthesis of 1,3-alternate calix[4]arene derivatives **23<sup>a</sup>**, **24<sup>b</sup>** and **25<sup>b</sup>**

Compound CA (1.0 g, 2.35 mmol) in 40 mL of dry pyridine was treated with benzoyl chloride (0.56 mL, 24 mmol) in the presence of Cs<sub>2</sub>CO<sub>3</sub> (15.34 g, 47.1 mmol). After reacting carried out at room temperature, the reaction system was evaporated to dryness under reduced pressure, and 40 mL of chloroform was added. Then 1 mol/L of HCl was slowly added and the pH was adjusted to neutral. The organic layer was washed with water and dried over MgSO<sub>4</sub> and the residue using petroleum ether / dichloromethane (100:1- 40:1) as a gradient eluent to give a white powder solid **23** (1.22 g, 83%).

Compound CA (1.0 g, 2.35 mmol) in 40 mL of dry acetone was treated with Iodo-n-propane (4.8 mL, 24 mmol) in the presence of Cs<sub>2</sub>CO<sub>3</sub> (15.34 g, 47.1 mmol). After reacting carried out at reflux temperature. Other procedures of preparing **24** were similar to **23**. The residue was purified by column chromatography to give **24** (0.73 g, 50%).

The procedures of preparing **25** were similar to **24**. The yield of the obtained compound was 53%.

**23**: <sup>1</sup>H NMR (300 MHz, DMSO):  $\delta$  (ppm) 3.48(d, 4H,  $J = 12$ Hz, ArCH<sub>2</sub>Ar), 3.94(d, 4H,  $J = 12$ Hz, ArCH<sub>2</sub>Ar), 6.77(t, 2H,  $J = 7.2$ Hz, ArH), 6.81-6.97 (m, 6H, ArH), 7.09-7.42 (m, 6H, ArH), 8.33 (d, 4H,  $J = 7.2$ Hz, ArH). ESI-MS:  $m/z = 655$ [M+Na]<sup>+</sup>

**24**: <sup>1</sup>H NMR (300 MHz, CDCl<sub>3</sub>):  $\delta$  (ppm) 0.92(t, 12H,  $J = 7.5$ Hz, CH<sub>3</sub>), 1.59-1.70(m, 8H, CH<sub>2</sub>CH<sub>2</sub>CH<sub>3</sub>), 3.53(t, 8H,  $J = 7.2$ Hz, CH<sub>2</sub>CH<sub>2</sub>CH<sub>3</sub>), 3.61 (s, 8H, ArCH<sub>2</sub>Ar), 6.67 (t, 4H,  $J = 7.5$  Hz, ArH). ESI-MS:  $m/z = 591$  [M-H]<sup>-</sup>.

**25**: <sup>1</sup>H NMR (300 MHz, CDCl<sub>3</sub>):  $\delta$  (ppm) 1.21(d, 24H,  $J = 6.0$ Hz, CH<sub>3</sub>), 3.61(s, 8H, ArCH<sub>2</sub>Ar), 4.14(hept, 4H,  $J = 6.0$ Hz, OCHMe<sub>2</sub>), 6.61(t, 4H,  $J = 7.2$ Hz, ArH), 7.01(d, 8H,  $J = 7.2$  Hz, ArH). ESI-MS:  $m/z = 591$  [M-H]<sup>-</sup>

## Synthesis of 1,3-alternate calix[4]arene derivatives **17<sup>c</sup>**, **18<sup>b</sup>**, **19<sup>d</sup>**, **20<sup>b</sup>** and **22<sup>b</sup>**

A mixture of calixarene **23** (0.47 g, 0.74 mmol), hexamethylenetetramine (3.84 g, 20.19 mmol), and trifluoroacetic acid (20 mL) was stirred at reflux for 48 h. Then the mixture was poured into 30 mL of ice-water and extracted with chloroform. The chloroform solution was washed with water and dried over MgSO<sub>4</sub>, and then filtered and concentrated under vacuum. The residue was purified using petroleum ether /

dichloromethane (40:1-10:1) as a gradient eluent to give **17** (0.40 g, 80%)

The procedures of preparing **18-20** and **22** were similar to **17** except that the reaction time.

**18** (reaction time: 48h, yield: 42%),

**19** (reaction time: 24h, yield: 18%),

**20** (reaction time: 24h, yield: 23%),

**22** (reaction time: 96h, yield: 11%),

**17**:  $^1\text{H}$  NMR (300 MHz,  $\text{CDCl}_3$ ):  $\delta$  (ppm) 9.68 (s, 2H, CHO), 8.26 (d, 4H,  $J = 7.2$  Hz, ArH), 7.77 (t, 2H,  $J = 6.9$  Hz, ArH), 7.59 (s, 4H, ArH), 7.55 (t, 4H,  $J = 7.5$  Hz, ArH), 6.95-7.02 (m, 6H, ArH), 6.19 (s, 2H, ArOH), 4.01 (d, 4H,  $J = 14.7$  Hz,  $\text{ArCH}_2\text{Ar}$ ), 3.69 (d, 4H,  $J = 14.7$  Hz,  $\text{ArCH}_2\text{Ar}$ ). ESI-MS:  $m/z$  687  $[\text{M}-\text{H}]^-$

**18** :  $^1\text{H}$  NMR ( $\text{CDCl}_3$ , 300 MHz): 9.69 (s, 4H, CHO), 7.53 (s, 8H, ArH), 4.42 (hept, 4H,  $J = 6.0$  Hz OCHMe<sub>2</sub>), 3.74 (s, 8H,  $\text{ArCH}_2\text{Ar}$ ), 1.33 (d, 24H,  $J = 6.0$  Hz, CH<sub>3</sub>).

$^{13}\text{C}$  NMR ( $\text{CDCl}_3$ , 75 MHz):  $\delta$  191.5 (CHO), 159.2, 134.3, 131.4, 130.5 (Ar), 74.9 (OCHMe<sub>2</sub>), 35.7 ( $\text{ArCH}_2\text{Ar}$ ), 22.5 (CH<sub>3</sub>). ESI-MS  $m/z$ : 727  $[\text{M}+\text{Na}]^+$

**19**:  $^1\text{H}$ NMR ( $\text{CDCl}_3$ , 300 MHz):  $\delta$  (ppm) 0.92-1.25 (m, 24H, CH<sub>3</sub>), 3.65-3.75(m, 8H,  $J = 12.7$  Hz,  $\text{ArCH}_2\text{Ar}$ ), 4.21-4.40(m, 4H, OCHMe<sub>2</sub>), 6.64(d, 4H,  $J = 7.5$ Hz, ArH), 6.82(d, 2H,  $J = 7.5$ Hz, ArH), 7.53(s, 4H, ArH), 9.80(s, 2H, CHO). ESI-MS:  $m/z = 671$   $[\text{M}+\text{Na}]^+$

**20**:  $^1\text{H}$ NMR (300MHz,  $\text{CDCl}_3$ ):  $\delta$  (ppm) 1.29-1.36(m, 24H, CH<sub>3</sub>), 3.59(d, 2H,  $J = 15.4$ Hz,  $\text{ArCH}_2\text{Ar}$ ), 3.66 (d, 2H,  $J = 15.4$ Hz,  $\text{ArCH}_2\text{Ar}$ ), 3.69(s, 4H,  $\text{ArCH}_2\text{Ar}$ ), 4.21-4.45(m, 4H, OCHMe<sub>2</sub>), 6.54(t, 1H,  $J = 7.5$ Hz, ArH), 6.97(d, 2H,  $J = 7.5$  Hz, ArH), 7.51(s, 2H, ArH), 7.55(s, 2H, ArH), 7.59(s, 2H, ArH), 9.68(s, 2H, CHO), 9.83(s, 1H, CHO). ESI-MS:  $m/z = 699$   $[\text{M}+\text{Na}]^+$

**22**:  $^1\text{H}$  NMR ( $\text{CDCl}_3$ , 300 MHz):  $\delta$  9.93 (s, 2H, CHO), 9.81 (s, 2H, CHO), 8.10 (s, 2H, ArOH), 7.73 (s, 4H, ArH), 7.64 (s, 2H, ArH), 7.61 (s, 2H, ArH), 4.40-4.52 (m, 2H, OCHMe<sub>2</sub>), 4.14 (s, 2H,  $\text{ArCH}_2\text{Ar}$ ), 4.07 (d, 2H,  $J = 15.3$  Hz,  $\text{ArCH}_2\text{Ar}$ ), 3.92 (d, 2H,  $J = 15.3$  Hz,  $\text{ArCH}_2\text{Ar}$ ), 3.83 (s, 2H,  $\text{ArCH}_2\text{Ar}$ ), 0.97 (d, 6H,  $J = 6.0$  Hz, CH<sub>3</sub>), 0.92 (d, 6H,  $J = 6.0$  Hz, CH<sub>3</sub>).

$^{13}\text{C}$  NMR ( $\text{CDCl}_3$ , 75 MHz):  $\delta$  190.5, 190.3 (CHO), 157.0, 156.9, 134.5, 133.2, 132.0, 131.4, 130.3, 129.7, 128.1, 127.3 (Ar), 74.2 (OCHMe<sub>2</sub>), 39.1, 34.9, 31.2 ( $\text{ArCH}_2\text{Ar}$ ), 21.4, 20.8 (CH<sub>3</sub>). ESI-MS  $m/z$ : 643  $[\text{M}+\text{Na}]^+$ .

### Synthesis calix[4]arene derivatives **16**<sup>d</sup>

An aqueous solution of 0.1mmol compound **17**, 5 mL of NaOH (20%) was added to 20 mL of methanol and heated to reflux overnight. After the completion of the reaction, the solvent was distilled off under reduced pressure, and 1 mol/L HCl was added until no precipitate was formed. After filtration, the solid **17** was washed with

water, and the product was quantitatively obtained.

<sup>1</sup>H NMR (300 MHz, CDCl<sub>3</sub>): δ (ppm) 10.18 (s, 4H, ArOH), 9.74 (s, 2H, CHO), 7.61 (s, 4H, ArH), 7.14 (d, 4H, J = 7.2 Hz, ArH), 6.81 (t, 2H, J = 7.5 Hz, ArH), 3.51-4.40 (m, 8H, ArCH<sub>2</sub>Ar). ESI-MS: m/z 479 [M-H]<sup>-</sup>.

### Synthesis calix[4]arene derivatives **21**<sup>c,e</sup>

0.2 g (0.28 mmol) compound **26** and 28 mmol NH<sub>2</sub>OH were added to 20 mL acetonitrile. After reflux for 5 days, intermediate product extracted with dichloromethane and dried. The obtained solid was added to 5 mL acetic acid and refluxed for one night. After the reaction was completed, a large amount of water was added. Then the mixture was poured into 30 mL of ice-water and extracted with chloroform. The chloroform solution was washed with water and dried over MgSO<sub>4</sub>, and then filtered and concentrated under vacuum. The residue was purified by column chromatography to give **21**(0.11g, 56%).

<sup>1</sup>H NMR (300 MHz, CDCl<sub>3</sub>): δ (ppm) 1.12(t, J = 7.4Hz, 6H, CH<sub>3</sub>), 1.99(m, 4H, CH<sub>2</sub>), 4.21(t, J = 6.6Hz, 4H, ArOCH<sub>2</sub>), 6.65(t, J = 7.7Hz, 4H, ArH), 7.05 (d, J = 7.8Hz, 4H, ArH), 7.87(s, 4H, ArH), 8.43 (s, 2H, ArOH). ESI-MS: m/z = 629 [M-H]<sup>-</sup>

**Ref:**(a) Magrans J O, de Mendoza J, Pons M, et al. Are 1, 3-Di-O-benzoylcalix [4] arenes an Exception to the 13C-NMR Rule for Conformational Determination?[J]. The Journal of organic chemistry, 1997, 62(13): 4518-4520.

(b) Yang W, Guo R, Wang W, et al. Tetrahedron Letters, 2012, 53(17): 2167-2170.

(c) Wei Wang. Nanotubes assembly based on Calixarenes by Intermolecular Forces. [D]. Wuhan University. 2015. 40-52

(d) Weiping Yang. The Influences of Substituents on the Formylations of Calixarenes on the Upper Rims and the Constructions of Calixarene-based Nanotubes [D]. Wuhan University. 2012. 79-83

(e) W. Wang, W. Yang, R. Guo and S. Gong, CrystEngComm, 2015, 17, 7663-7675

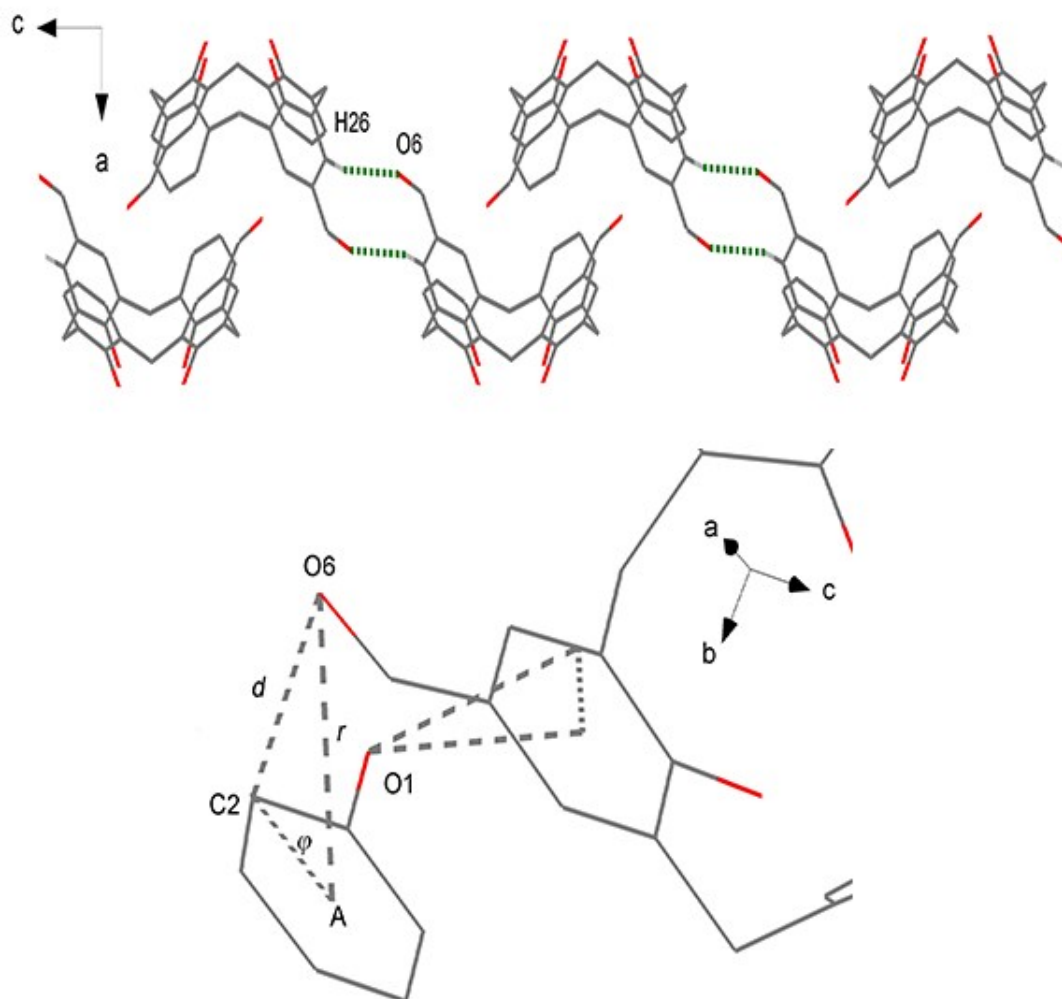

**Figure S1** (A)  $C-H \cdots O$  interactions was found in a wave structure of **16**. (B) The intermolecular  $O \cdots \pi$  interactions was found in compound **16**. (The intermolecular  $\pi \cdots \pi$ ,  $C-H \cdots O$  and  $O \cdots \pi$  interactions are red, green and grey dot lines, respectively).

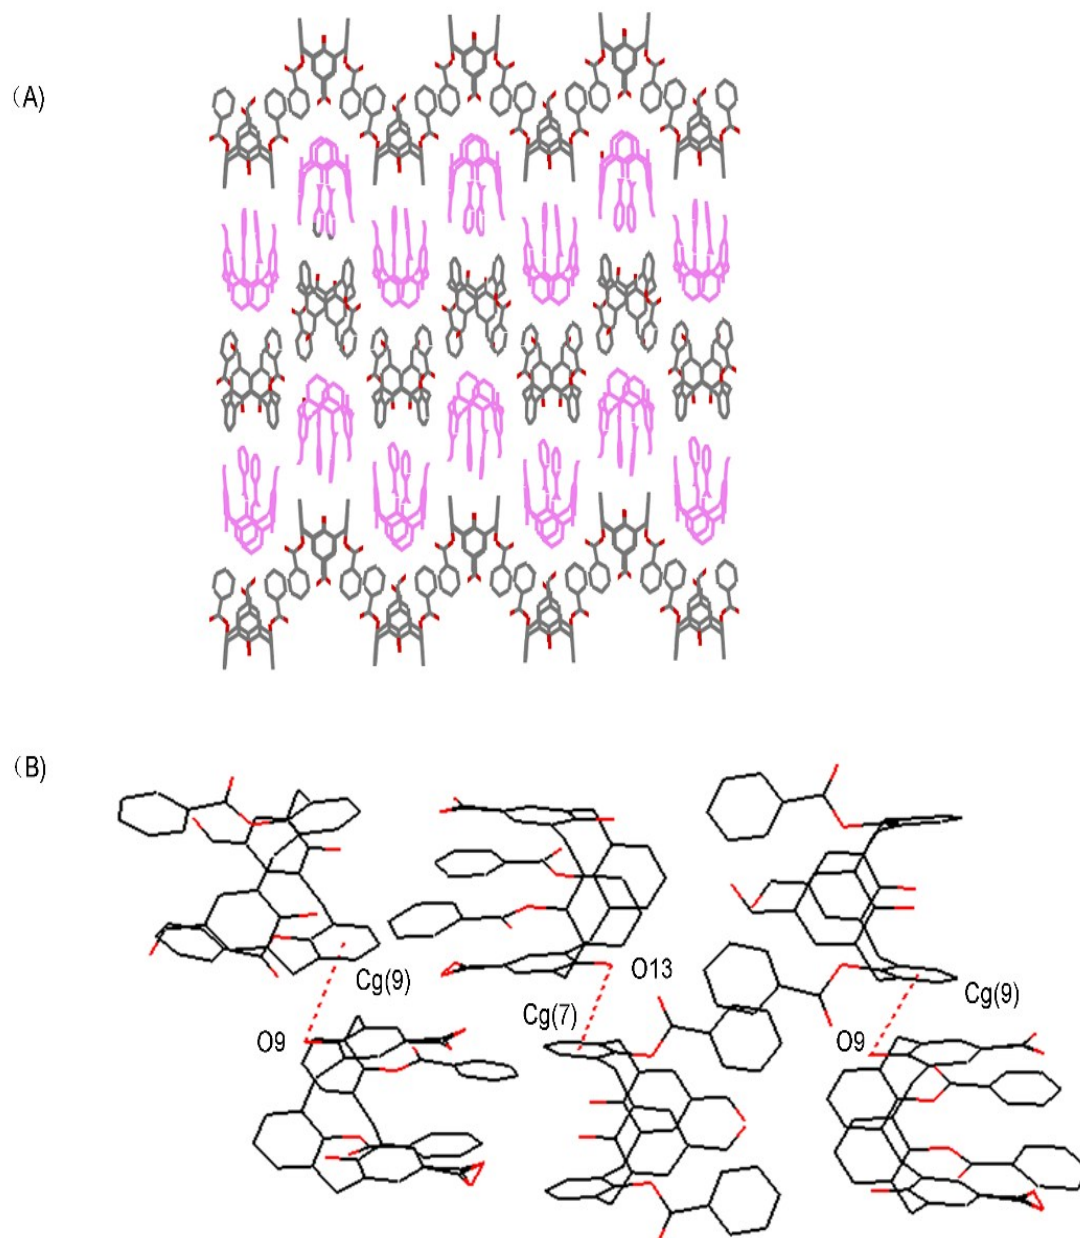



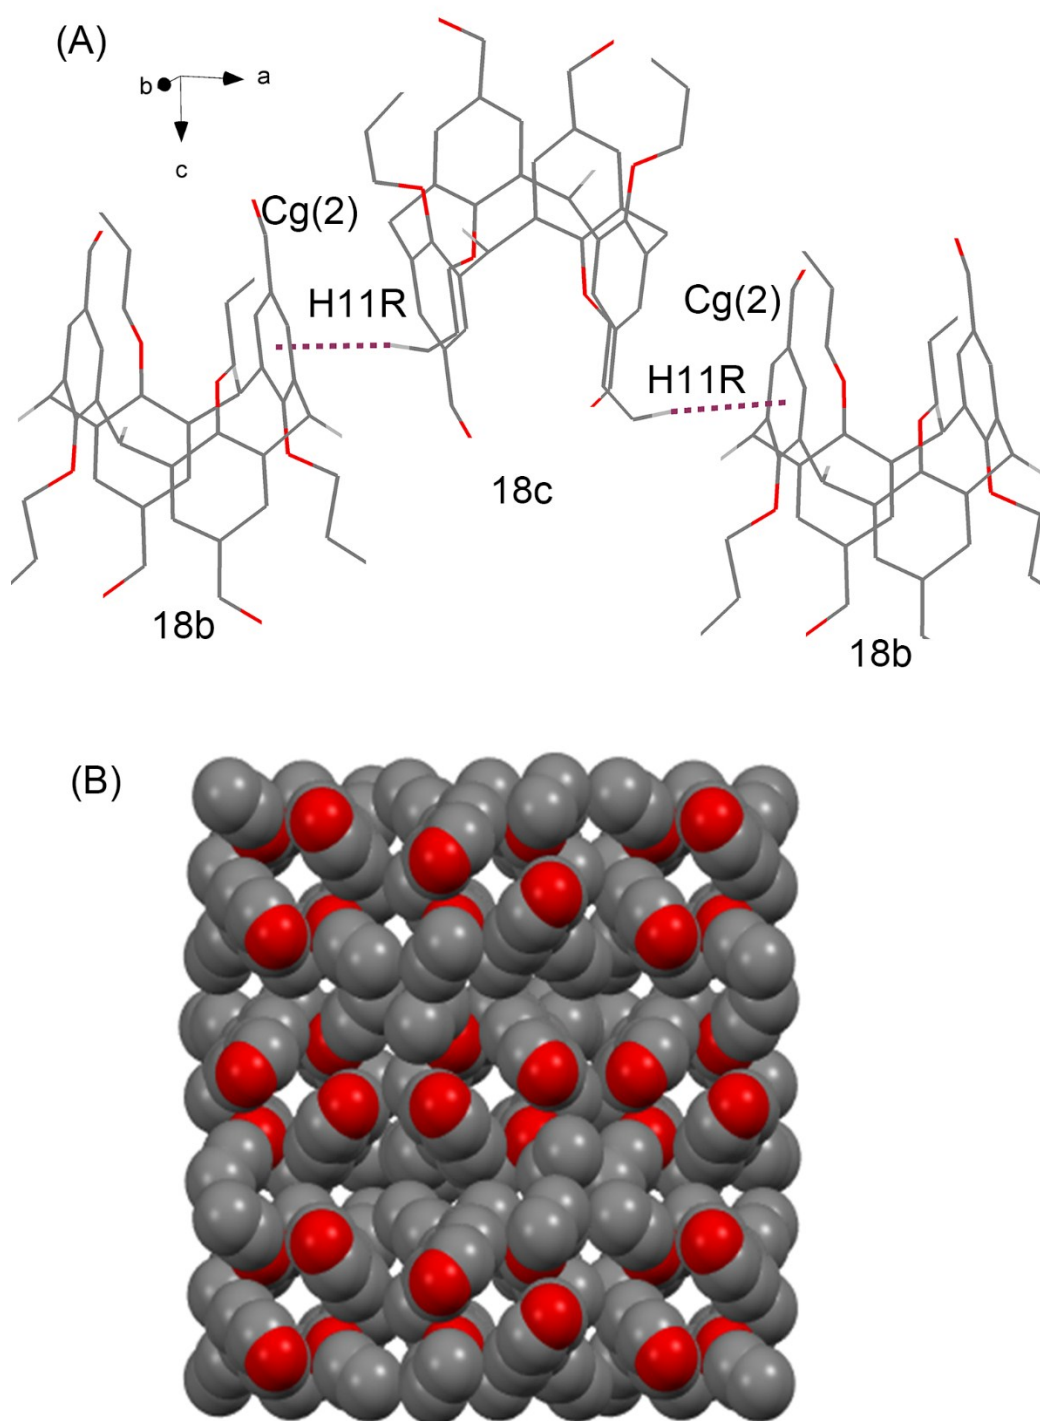

**Figure S3** (A) The intermolecular C-H $\cdots$  $\pi$  interactions was observed in crystal **18**. (B) Space-filling representation of the extended structure was observed in compound **18** in the presence of weak bonds. (The intermolecular C-H $\cdots$  $\pi$  interactions is purple dot lines)

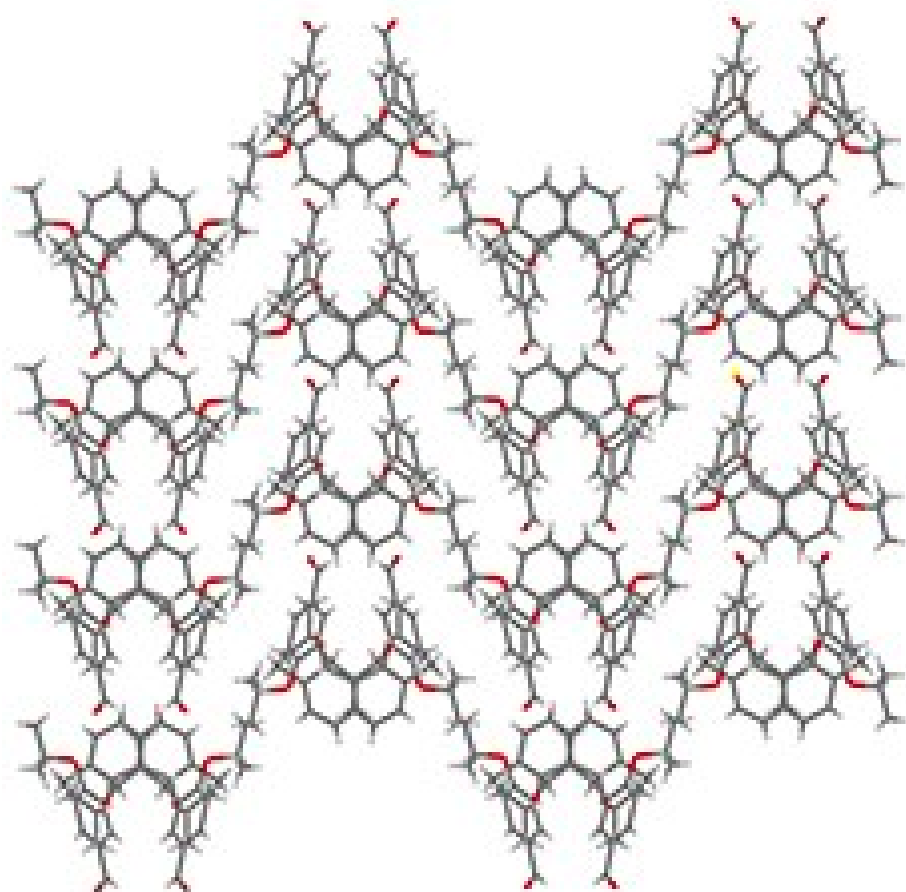

**Figure S4** One-dimensional wave structure in compound **19**

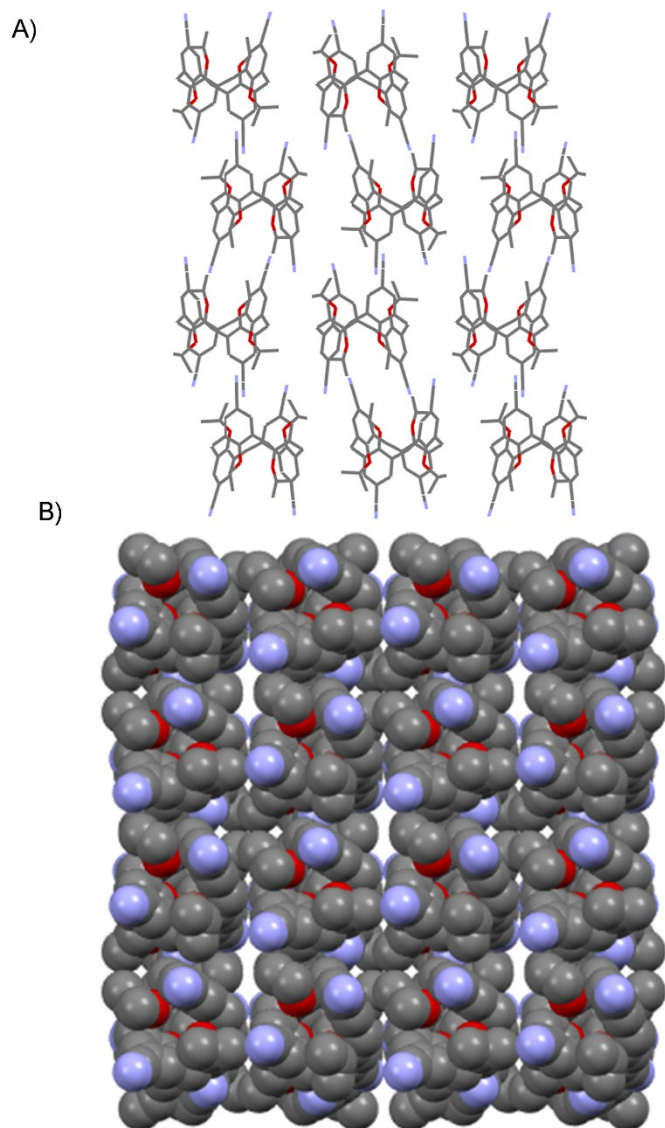

**Figure S5** (A) Compounds **21** packs staggered in the crystal. (B) Space-filling representation of the extended structure in the compound **21** were formed by weak molecular forces.

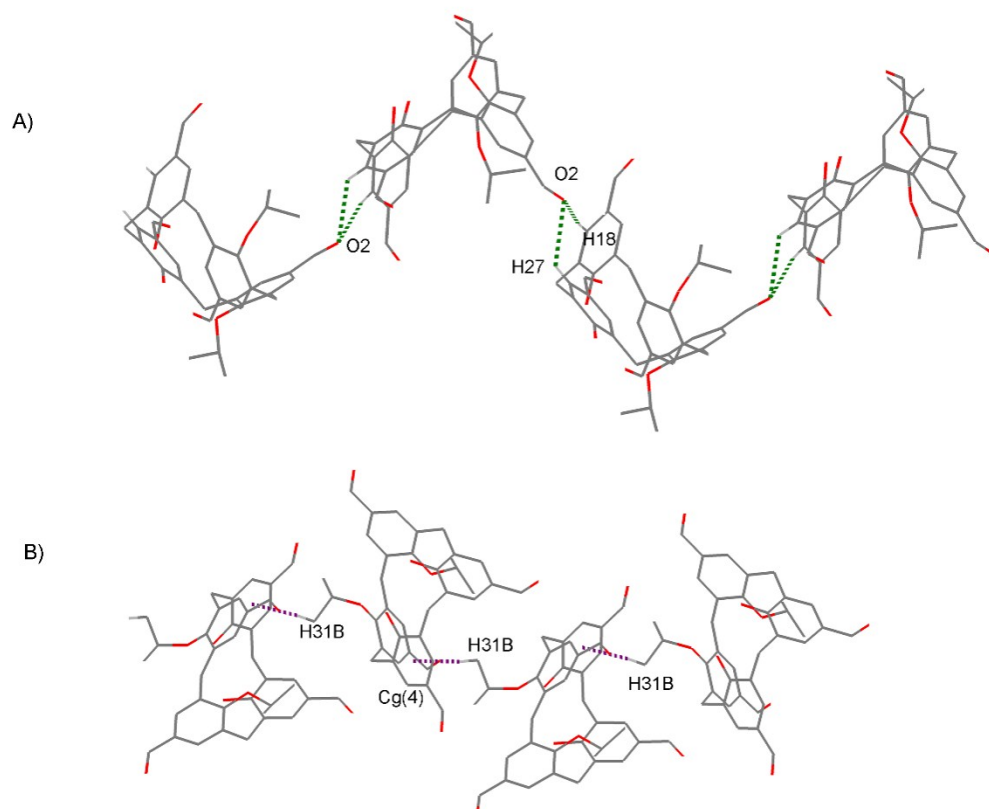

**Figure S6 (A)** One-dimensional wave structure of **22** was formed through C–H···O interactions. **(B)** The intermolecular C–H··· $\pi$  interactions was observed in the single crystal structure of **22**. (The intermolecular C–H···O and C–H··· $\pi$  interactions are green and violet dot lines)

**Table S1** Dihedral angles of aromatic rings and reference molecular plane R of the seven compounds

| Compound              | Plane AR (°)                                                        | Plane BR (°)           | Plane CR (°)           | Plane DR (°)           |
|-----------------------|---------------------------------------------------------------------|------------------------|------------------------|------------------------|
| <b>16</b>             | 125.88(3)                                                           | 128.60(4)              | 125.54(8)              | 123.29(3)              |
| <b>17<sup>a</sup></b> | 93.82(2)<br>(95.10(4))                                              | 75.80(3)<br>(84.43(3)) | 95.68(6)<br>(97.83(7)) | 78.91(5)<br>(80.58(9)) |
| <b>18<sup>b</sup></b> | 88.05(2) <sup>a</sup> /88.29(4) <sup>b</sup> /89.29(2) <sup>c</sup> | 82.61(3) <sup>b</sup>  |                        |                        |
| <b>19</b>             | 71.75(5)                                                            | 77.64(2)               |                        |                        |
| <b>20</b>             | 71.81(4)                                                            | 72.21(5)               | 76.65(3)               | 73.75(3)               |
| <b>21</b>             | 100.31(3)                                                           | 106.18(6)              | 104.79(5)              | 97.12(3)               |
| <b>22</b>             | 110.71(3)                                                           | 109.05(4)              | 111.87(4)              | 138.33(6)              |

a. There are two types of molecules in compound **17**.

b. There are three types of molecules in compound **18**.

**Table S2** Dihedral angles of the opposite aromatic rings of the seven compounds

| Compound              | Plane AC (°)                                                      | Plane BD (°)           |
|-----------------------|-------------------------------------------------------------------|------------------------|
| <b>16</b>             | 71.54(9)                                                          | 71.80(6)               |
| <b>17<sup>a</sup></b> | 8.73(3)<br>(14.61(5))                                             | 26.47(8)<br>(13.09(3)) |
| <b>18<sup>b</sup></b> | 13.05(2) <sup>a</sup> /9.35(4) <sup>b</sup> /5.66(6) <sup>c</sup> | 13.64(7) <sup>b</sup>  |
| <b>19</b>             | 34.52(3)                                                          | 29.81(5)               |
| <b>20</b>             | 36.25(9)                                                          | 29.44(9)               |
| <b>21</b>             | 25.49(7)                                                          | 23.30(4)               |
| <b>22</b>             | 42.58(2)                                                          | 29.73(7)               |

a There are two types of molecules in compound **17**.

b There are three types of molecules in compound **18**.

**Table S3**  $\pi \cdots \pi$  interactions for five compounds

| Compound                                                                                                                                                      | Cg(I) $\cdots$ Cg(J)   | Symmetry           | $\alpha$ | Cg $\cdots$ Cg | Cg(J)Perp   | Cg(J)Perp   |
|---------------------------------------------------------------------------------------------------------------------------------------------------------------|------------------------|--------------------|----------|----------------|-------------|-------------|
| <b>16<sup>a</sup></b>                                                                                                                                         | Cg(1) $\cdots$ Cg(4)   | -1/4+Y,5/4-X,5/4-Z | 2.25(7)  | 3.609(2)       | -3.4969(14) | 3.4632(16)  |
|                                                                                                                                                               | Cg(2) $\cdots$ Cg(3)   | -1/4+Y,5/4-X,9/4-Z | 2.93(4)  | 3.5850(19)     | -3.3770(13) | 3.3760(12)  |
| <b>17<sup>b</sup></b>                                                                                                                                         | Cg(1) $\cdots$ Cg(9)   | -1/2+X,1/2-Y,2-Z   | 11.94(9) | 3.9560(18)     | 3.1353(12)  | -3.5379(12) |
|                                                                                                                                                               | Cg(3) $\cdots$ Cg(7)   | 1/2+X,1/2-Y,2-Z    | 10.60(6) | 3.7971(17)     | -3.2843(12) | 3.5787(12)  |
|                                                                                                                                                               | Cg(11) $\cdots$ Cg(12) | 1/2+X,Y,3/2-Z      | 0.29(8)  | 3.820(2)       | 3.5925(15)  | 3.5984(16)  |
| <b>a. 6-Membered Ring (Cg)</b> Cg(1): C(1)- C(6), Cg(2): C(8)- C(13), Cg(3): C(15)- C(20)<br>Cg(4): C(22)- C(27)                                              |                        |                    |          |                |             |             |
| <b>b. 6-Membered Ring (Cg)</b> Cg(1): C(45)- C(50), Cg(3): C(60)- C(65), Cg(7): C(1)- C(6)<br>Cg(9): C(16)- C(21), Cg(11): C(32)- C(37), Cg(12): C(39)- C(44) |                        |                    |          |                |             |             |

**Table S4** O  $\cdots$   $\pi$  interactions in compounds **16**, **17** and **22**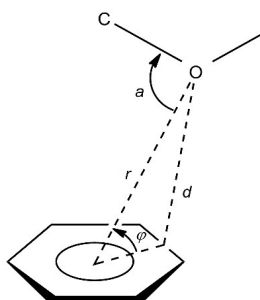

| Compound              | C - O $\cdots$ Cg          | $r/\text{\AA}$ |             | $d/\text{\AA}$ | $\alpha(^{\circ})$ | $\varphi(^{\circ})$ |
|-----------------------|----------------------------|----------------|-------------|----------------|--------------------|---------------------|
| <b>16<sup>a</sup></b> | C(30)-O(5) $\cdots$ Cg(2)  | 4.169(16)      | C(13)       | 3.552(12)      | 60.89(7)           | 54.30(6)            |
|                       | C(9)-O(2) $\cdots$ Cg(3)   | 4.268(9)       | C(15)-C(16) | 3.666(7)       | 58.32(3)           | 52.82(8)            |
| <b>17<sup>b</sup></b> | C(50)-O(9) $\cdots$ Cg(9)  | 4.173(6)       | C(20)       | 3.617(11)      | 66.53(4)           | 57.76(3)            |
|                       | C(61)-O(13) $\cdots$ Cg(7) | 3.954(7)       | C(1)        | 3.562(6)       | 68.30(4)           | 64.81(4)            |
| <b>22</b>             | C(32)-O(2) $\cdots$ Cg(1)  | 3.771(15)      | C(5)-C(6)   | 3.379(5)       | 89.06(5)           | 62.27(2)            |

**a. 6-Membered Ring (Cg)** Cg(2): C(8)- C(13), Cg(3): C(15)- C(20)

**b. 6-Membered Ring (Cg)** Cg(7): C(1)- C(6), Cg(9): C(16)- C(21)

**c. 6-Membered Ring (Cg)** Cg(1): C(1)- C(6)

**Table S5** Hydrogen bonds of five compounds

| Compound | D–H···A (Å)                                  | H···A (Å) | D···A (Å) | <(D–H···A)(°) |
|----------|----------------------------------------------|-----------|-----------|---------------|
| 16       | O(1)–H(1A)···O(3) <sup>a</sup>               | 1.89(2)   | 2.669(4)  | 143(7)        |
|          | O(2)–H(2)···O(1) <sup>a</sup>                | 1.87(5)   | 2.672(4)  | 170(6)        |
|          | O(3)–H(3A)···O(4) <sup>a</sup>               | 1.88(3)   | 2.676(4)  | 163(8)        |
|          | O(4)–H(4)···O(2) <sup>a</sup>                | 1.85(5)   | 2.664(3)  | 176(1)        |
|          | C(16)–H(16)···O(5) <sup>b</sup>              | 2.54(3)   | 3.440(4)  | 164(3)        |
|          | C(18)–H(18)···O(6) <sup>b</sup>              | 2.60(2)   | 3.491(5)  | 166(5)        |
| 17       | O(9)–H(9)···O(6) <sup>b</sup>                | 2.48(7)   | 3.070(3)  | 130(3)        |
|          | O(13)–H(13A)···O(2) <sup>b</sup>             | 2.35(6)   | 2.930(4)  | 129(6)        |
|          | C(5)–H(5)···O(10) <sup>b</sup>               | 2.58(6)   | 3.474(8)  | 162(5)        |
|          | C(5)–H(5)···O(10 <sup>+</sup> ) <sup>b</sup> | 2.47(3)   | 3.331(8)  | 154(7)        |
|          | C(6)–H(6)···O(16) <sup>b</sup>               | 2.40(5)   | 3.282(4)  | 158(6)        |
|          | C(7)–H(7B)···O(16) <sup>b</sup>              | 2.60(2)   | 3.507(3)  | 156(3)        |
|          | C(18)–H(18)···O(14) <sup>b</sup>             | 2.39(4)   | 3.261(7)  | 155(5)        |
|          | C(42)–H(42)···O(9) <sup>b</sup>              | 2.52(3)   | 3.408(4)  | 161(8)        |
|          | C(58)–H(58)···O(6) <sup>b</sup>              | 2.54(9)   | 3.370(4)  | 148(4)        |
|          | C(67)–H(67A)···O(2) <sup>b</sup>             | 2.58(3)   | 3.424(4)  | 145(5)        |
|          | C(73)–H(73)···O(2) <sup>b</sup>              | 2.56(4)   | 3.352(4)  | 143(3)        |
|          | C(78)–H(78)···O(7) <sup>b</sup>              | 2.72(7)   | 3.558(4)  | 151(7)        |
| 18       | C(1A)–H(1A)···O(1A) <sup>b</sup>             | 2.53(3)   | 3.430(9)  | 159(6)        |
|          | C(1B)–H(1B)···O(1C) <sup>b</sup>             | 2.56(2)   | 3.474(9)  | 162(9)        |
|          | C(1C)–H(1C)···O(1B) <sup>b</sup>             | 2.44(1)   | 3.313(8)  | 152(5)        |
|          | C(7D)–H(7DB)···O(1C) <sup>a</sup>            | 2.50(3)   | 3.443(8)  | 160(3)        |
|          | C(7B)–H(7BA)···O(1A) <sup>b</sup>            | 2.69(6)   | 3.531(7)  | 143(5)        |
|          | C(7D)–H(7DB)···O(1C) <sup>b</sup>            | 2.50(2)   | 3.637(2)  | 160(5)        |
|          | C(11B)–H(11E)···O(1B)                        | 2.61(6)   | 3.452(2)  | 145(9)        |
|          | C(1D)–H(1D)···O(1D)                          | 2.74(7)   | 3.267(8)  | 158(4)        |
| 21       | C(2)–H(2)···N(3) <sup>b</sup>                | 2.69(5)   | 3.585(4)  | 163(7)        |
|          | C(13)–H(13)···N(1) <sup>b</sup>              | 2.69(3)   | 3.601(3)  | 166(2)        |
|          | C(26)–H(26)···N(1) <sup>b</sup>              | 2.62(5)   | 3.508(5)  | 160(5)        |
|          | C(37)–H(37)···N(3) <sup>b</sup>              | 2.83(5)   | 3.639(3)  | 146(4)        |
|          | C(39)–H(39)···N(2) <sup>b</sup>              | 2.70(8)   | 3.427(5)  | 158(4)        |
|          | C(15)–H(15)···N(4) <sup>b</sup>              | 2.58(4)   | 3.472(5)  | 160(7)        |
|          | C(24)–H(24)···N(4) <sup>b</sup>              | 2.50(5)   | 3.418(5)  | 170(6)        |
| 22       | C(37)–O(6)···Cl(2) <sup>b</sup>              |           | 3.027(9)  | 145(6)        |
|          | C(35)–H(35B)···Cl(1) <sup>b</sup>            | 2.79(3)   | 3.693(5)  | 156(4)        |
|          | O(5)–H(5)···O(7) <sup>a</sup>                | 1.97(3)   | 2.756(5)  | 161(8)        |
|          | O(7)–H(7)···O(1) <sup>a</sup>                | 1.86(5)   | 2.657(4)  | 162(9)        |
|          | C(14)–H(14)···O(6) <sup>b</sup>              | 2.56(8)   | 3.416(7)  | 146(2)        |
|          | C(35)–H(35B)···O(5) <sup>b</sup>             | 2.79(6)   | 3.693(12) | 156(3)        |
|          | C(39)–H(39A)···O(5) <sup>b</sup>             | 2.37(6)   | 3.212(18) | 145(3)        |
|          | C(32)–H(32)···O(3) <sup>b</sup>              | 2.66(3)   | 3.570(2)  | 166(4)        |

|                               |         |          |        |
|-------------------------------|---------|----------|--------|
| C(27)–H(27)⋯O(2) <sup>b</sup> | 2.72(8) | 3.414(7) | 133(2) |
| C(18)–H(18)⋯O(2) <sup>b</sup> | 2.68(5) | 3.595(8) | 169(8) |
| C(28)–H(28)⋯O(6) <sup>b</sup> | 2.62(5) | 3.438(2) | 142(3) |

a represents intramolecular hydrogen bonding.

b represents intermolecular hydrogen bonding

**Table S6** C–H⋯ $\pi$  interactions for five compounds

| Compound              | Atoms involved C–H⋯Cg | Symmetry            | H⋯Cg    | C⋯Cg      | <C–H⋯Cg |
|-----------------------|-----------------------|---------------------|---------|-----------|---------|
| <b>17<sup>a</sup></b> | C(15)–H(15A)⋯Cg(10)   | 1/2–X, 1/2+Y, Z     | 3.14(9) | 3.876(10) | 134(3)  |
|                       | C(71)–H(17)⋯Cg(8)     | –X, 1–Y, 2–Z        | 3.41(7) | 4.017(8)  | 125(5)  |
|                       | C(52)–H(52A)⋯Cg(9)    | 1/2+X, Y, 5/2–Z     | 3.23(8) | 3.80(6)   | 129(5)  |
| <b>18<sup>b</sup></b> | C(11D)–H(11R)⋯Cg(2)   | 2–Y, X, –Z          | 2.91(6) | 3.745(7)  | 144(7)  |
| <b>19<sup>c</sup></b> | C(17)–H(17)⋯Cg(1)     | 1/2+X, 1/2+Y, Z     | 3.30(5) | 4.07(11)  | 142(4)  |
| <b>20<sup>d</sup></b> | C(7)–H(7A)⋯Cg(4)      | 1/2+X, 1/2–Y, –Z    | 3.15(3) | 3.84(6)   | 133(3)  |
| <b>21<sup>e</sup></b> | C(10)–H(10B)⋯Cg(4)    | 1/2–X, 1/2–Y, –Z    | 3.22(5) | 4.03(9)   | 144(8)  |
| <b>22<sup>f</sup></b> | C(21)–H(21B)⋯Cg(4)    | 1/2–X, 3/2–Y, –Z    | 2.82(6) | 3.512(5)  | 129(3)  |
|                       | C(31)–H(31B)⋯Cg(4)    | 1/2–X, 1/2+Y, 1/2–Z | 2.85(8) | 3.755(7)  | 158(2)  |

a. **6-Membered Ring (Cg)** Cg(8): C(8)–C(13), Cg(9): C(16)–C(21), Cg(10): C(23)–C(28),

b. **6-Membered Ring (Cg)** Cg(2): C(2C)–C(4C)

c. **6-Membered Ring (Cg)** Cg(1): C(1)–C(6)

d. **6-Membered Ring (Cg)** Cg(4): C(22)–C(27)

e. **6-Membered Ring (Cg)** Cg(4): C(34)–C(39)

f. **6-Membered Ring (Cg)** Cg(4): C(22)–C(27)
